# Supplementary material for: FLAGS, frequently mutated genes in public exomes
Source: PubMed Central journal article supplement (PMC4267152; doi:10.1186/s12920-014-0064-y), 2014-12-03

# Distribution of HPO disease terms

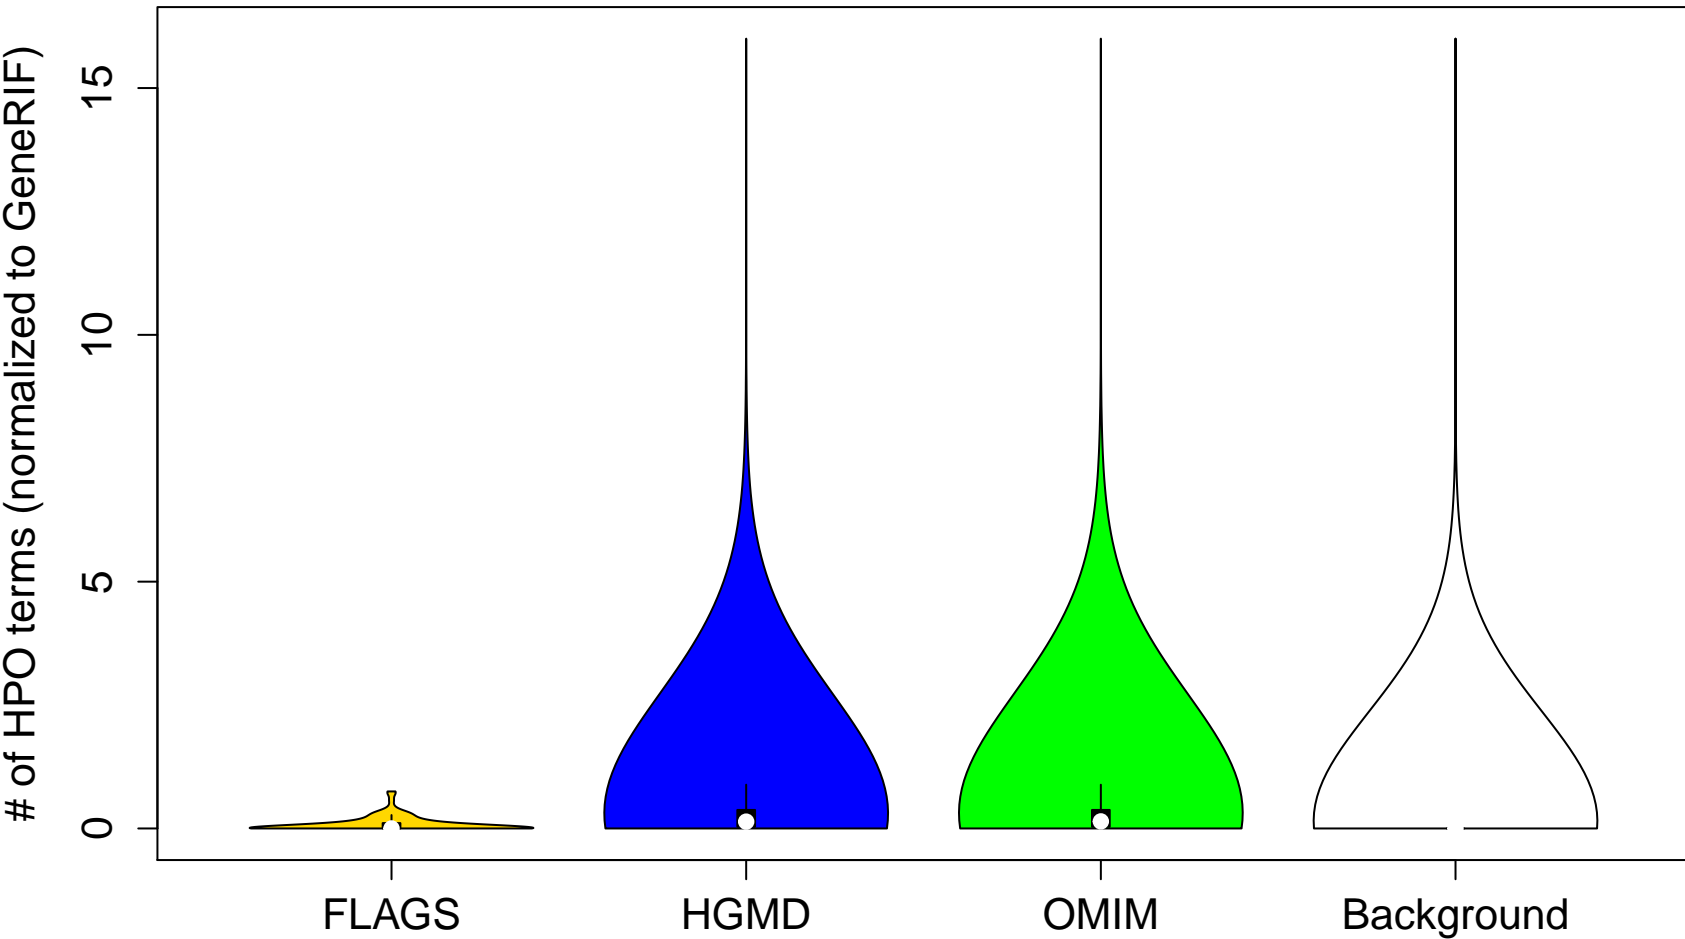

Supplement: 12920_2014_64_MOESM2_ESM.pdf [file 12920_2014_64_MOESM2_ESM.pdf]
